## ORIGINAL ARTICLE

# Delayed pubertal onset and prepubertal *Kiss1* expression in female mice lacking central oestrogen receptor beta

Lydie Naulé<sup>1,2,3</sup>, Vincent Robert<sup>4,5,6,7</sup>, Caroline Parmentier<sup>1,2,3</sup>, Mariangela Martini<sup>4,5,6,7</sup>, Matthieu Keller<sup>4,5,6,7</sup>, Martine Cohen-Solal<sup>8</sup>, Hélène Hardin-Pouzet<sup>1,2,3</sup>, Valérie Grange-Messent<sup>1,2,3</sup>, Isabelle Franceschini<sup>4,5,6,7</sup> and Sakina Mhaouty-Kodja<sup>1,2,3,\*</sup>

<sup>1</sup>Neuroscience Paris Seine, Institut National de la Santé et de la Recherche Médicale, Unité Mixte de Recherche (UMR) S1130, <sup>2</sup>Centre National de la Recherche Scientifique, UMR 8246, Université P. et M. Curie, Paris, France, <sup>3</sup>Sorbonne Universités, Université P. et M. Curie UM CR18, Université Paris 06, Paris, France, <sup>4</sup>Institut National de la Recherche Agronomique, UMR 85, Nouzilly, France, <sup>5</sup>Centre National de la Recherche Scientifique, UMR 7247, Nouzilly, France, <sup>6</sup>Université François Rabelais, Tours, France, <sup>7</sup>Institut Français du Cheval et de l'Équitation, Nouzilly, France and <sup>8</sup>Inserm U1132 and university Paris-Diderot, Hospital Lariboisière, Paris, France

\*To whom correspondence should be addressed at: INSERM U1130, CNRS UMR 8246, Université P. & M. Curie, 7 quai St Bernard, Bât A 3<sup>ème</sup> étage 75005, Paris, France. Tel: +331 44279138; Fax: +331 44272508; Email: sakina.mhaouty-kodja@upmc.fr

## Abstract

Ovarian oestradiol is essential for pubertal maturation and adult physiology of the female reproductive axis. It acts at central and peripheral sites through two main oestrogen receptors (ER)  $\alpha$  and  $\beta$ . Here we investigate the role of ER $\beta$  on central effects of oestradiol, by generating a mouse line specifically lacking the ER $\beta$  gene in neuronal and glial cells. Central ER $\beta$  deletion delays the age at vaginal opening and first oestrous and reduces uterine weight without affecting body growth. Analysis of factors necessary for pubertal progression shows reduced levels of *Kiss1* transcripts at postnatal (P) day 25 in the preoptic area, but not in the mediobasal hypothalamus (MBH) of mutant females. In agreement with these data, the number of kisspeptin-immunoreactive neurons was decreased by 57–72% in the three subdivisions of the rostral periventricular area of the third ventricle (RP3V), whereas the density of kisspeptin-immunoreactive fibres was unchanged in the arcuate nucleus of mutant mice. These alterations do not involve changes in ER $\alpha$  mRNAs in the preoptic area and protein levels in the RP3V. The number and distribution of GnRH-immunoreactive cells were unaffected, but gonadotropin-releasing hormone (GnRH) transcript levels were higher in the P25 preoptic area of mutants. At adulthood, mutant females have normal oestrous cyclicity, kisspeptin system and exhibit unaltered sexual behaviour. They display, however, reduced ovary weight and increased anxiety-related behaviour during the follicular phase. This argues for the specific involvement of central ER $\beta$  in the regulation of pubertal onset in female reproduction, possibly through prepubertal induction of kisspeptin expression in the RP3V.

## Introduction

Pubertal maturation is triggered by the central activation of pulsatile GnRH secretion, which stimulates pituitary gonadotropin secretion necessary for sexual maturation. This process is timely regulated by genetic, nutritional and environmental factors, with 50–80% of the variance in the age of menarche attributed to genetic effects (1). Major concerns are currently raised about the progressive decrease in age of pubertal onset in girls around the world (2). The factors triggering precocious puberty are not known, but a growing body of evidence suspects a potential involvement of environmental chemicals, which can interfere with sex steroid functions (3–5). Indeed, ovarian oestradiol plays a key role in controlling female pubertal maturation. However, its molecular mechanisms are not completely defined. Human analyses of polymorphic variants encoding the oestrogen receptor  $\alpha$  ( $ER\alpha$ ) suggest either positive or negative association with the age of menarche in girls (6–10). Studies conducted on the  $ER\beta$  suggest that receptor genotypes may contribute to genetic variability of the age at menarche (9). Moreover, combined  $ER\alpha$  and  $ER\beta$  polymorphisms seem to further influence this event, suggesting a potential interaction between the two receptors in the regulation of menarcheal age (9,11).

Rodent studies highlighted the role of  $ER\alpha$  in reproductive functions including pubertal maturation. At the central level, conditional inactivation of  $ER\alpha$  gene resulted in arrested pubertal onset and infertility, indicating the importance of this signalling pathway in oestradiol effects (12–14). In this context, the role of  $ER\beta$  still needs to be clarified. Genetic models with ubiquitous deletion limit the understanding of the central contribution of  $ER\beta$  (15–18). Only one recent study used conditional mutagenesis to target  $ER\beta$  ablation within forebrain neurons, or specifically in GnRH neurons (12). The data showed that  $ER\beta$  at these sites was neither necessary nor sufficient for oestrous cyclicity and oestradiol negative feedback in adult females. Whether or not  $ER\beta$  located in other central sites participates in these processes or in pubertal maturation remains to be determined. First,  $ER\beta$  was detected in both neuronal and glial cells and localized, although to a lesser extent level than  $ER\alpha$ , in many regions of the brain known to play a crucial role in central control of fertility (19,20). Second, oestradiol controls both the timing of pubertal maturation and the increase of kisspeptin expression during puberty (13,21,22). Kisspeptin is a key neuropeptide encoded by the *Kiss1* gene, involved in the regulation of GnRH secretion (23–25). Compelling evidence supports its role in the regulation of the hypothalamus-pituitary-gonad axis both at puberty and during adulthood (26,27).

The current study was undertaken to determine the effects of early deletion of central  $ER\beta$  on female pubertal onset and adult reproduction. For this purpose, we generated a mouse model lacking  $ER\beta$  throughout the nervous system by using exon 3-floxed mice (15) and transgenic animals where Cre recombinase was expressed in both neuronal and glial cells (28). The age of pubertal maturation and expression levels of molecular factors known to participate in the central regulation of puberty were assessed in this mouse line. The adult reproductive phenotype was studied by analysing oestrous cyclicity, hormonal levels and fertility. Sexual behaviour was assessed together with general behaviours including locomotor activity and anxiety-related behaviour known to be modulated by oestradiol (29,30).

## Results

### Selective inactivation of central $ER\beta$ gene

The mouse line lacking the central  $ER\beta$  gene was obtained by crossing females in which exon 3 of  $ER\beta$  was flanked by loxP

sites (15) with males expressing the Cre recombinase under the control of the nestin promoter (*Nes*) and a neural enhancer (28). To confirm that the  $ER\beta$  deletion was restricted to the nervous system, polymerase chain reaction (PCR) of DNA extracted from the brain, ovary and tail was carried out using primers that flank exon 3 of  $ER\beta$  (15). As shown in Figure 1A, a small amplicon of 250 bp indicating Cre-mediated excision of exon 3, was found in the brain, but not the ovary, of mutant females ( $ER\beta^{NesCre}$  carrying the *NesCre* transgene) in comparison to control mice ( $ER\beta^{fl/fl}$ ) where a signal of 850 bp was seen. The selective central deletion of  $ER\beta$  was further confirmed by Reverse transcription-PCR (RT-PCR) where the presence of a 177 bp-amplified fragment revealed the presence of  $ER\beta$  mRNAs (Fig. 1B). This fragment was seen in the ovary of  $ER\beta^{fl/fl}$  and  $ER\beta^{NesCre}$  females and in the brain of  $ER\beta^{fl/fl}$  females. The signal was reduced by 98% in the brain of  $ER\beta^{NesCre}$  mice.

### Delayed puberty of $ER\beta^{NesCre}$ females

Pubertal maturation was analysed by measuring the time of vaginal opening and first oestrus. Data illustrated in Figure 2A show that vaginal opening for  $ER\beta^{NesCre}$  females was approximately 1.7 days later than for their control littermates ( $26.5 \pm 0.7$  versus  $28.2 \pm 0.9$ ) and first oestrus was 6 days later ( $43.6 \pm 0.9$  versus

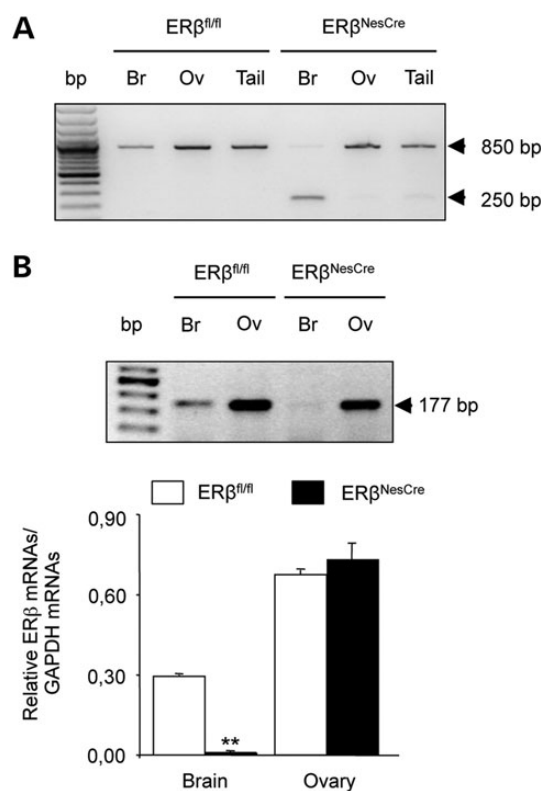

**Figure 1.** (A) PCR analysis showing the presence of the floxed  $ER\beta$  allele (850 bp) in the brain (Br), ovary (Ov) and tail of control mice ( $ER\beta^{fl/fl}$ ), and ovary and tail of mutant females ( $ER\beta^{NesCre}$ ). The small amplicon of 250 base pair (bp) indicating Cre-mediated excision of exon 3 was present in the brain of mutant females. DNA size markers at 100 bp increments are shown in the left column. (B) RT-PCR of total RNAs obtained from the brain and ovary. Up: Representative gel showing the presence of the 177 bp-amplified fragment. DNA size markers at 50 bp increments are shown in the left column. Down: Quantitative data normalized to GAPDH from 3 to 4 females per genotype show a decrease of ~98% in  $ER\beta$  expression in the brain of mutant females. \*\* $P < 0.001$  versus control mice.

37.3 ± 1.2). The time from vaginal opening to first oestrus is also significantly longer in mutants than in controls (15.5 ± 1.5 versus 10.8 ± 1.3,  $P < 0.05$ ). A detailed analysis of the cumulative percentage of females exhibiting first oestrous shows a rightward shift in the age of first oestrous in mutant females (Fig. 2B). The first oestrus occurred in 50% of control females at postnatal day (P) 37 versus P43 in mutant females. This pubertal phenotype was specifically linked to *ERβ* gene disruption in the nervous system

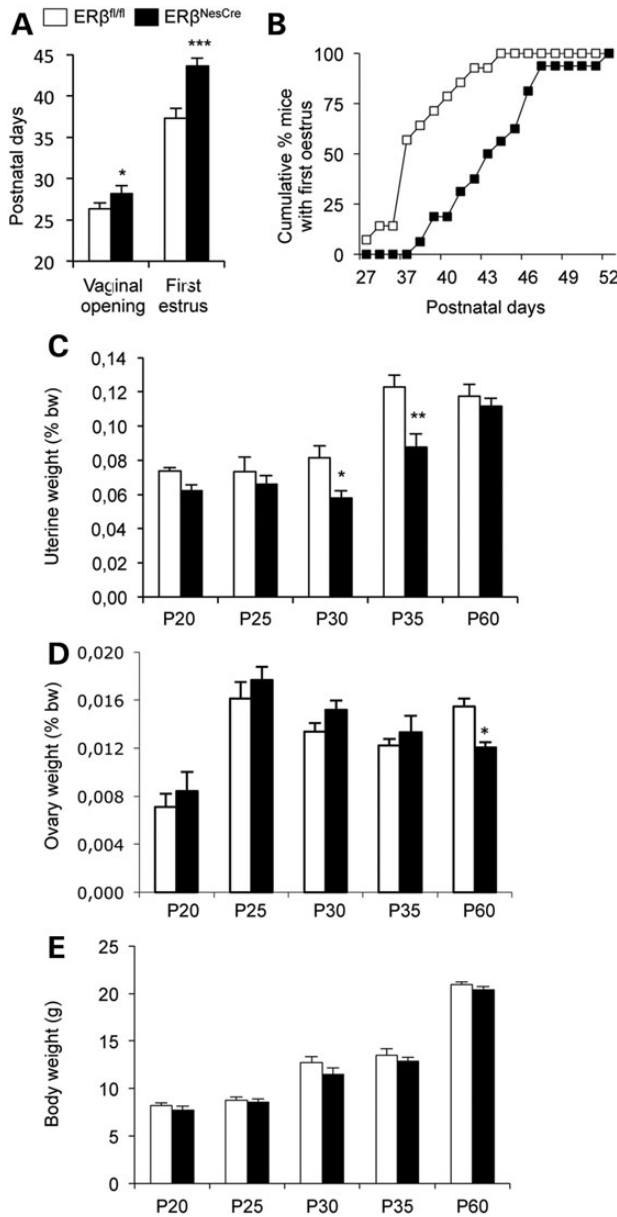

**Figure 2.** Delayed pubertal onset in *ERβ<sup>NesCre</sup>* female mice. (A) Age at vaginal opening and first oestrus in *ERβ<sup>fl/fl</sup>* and *ERβ<sup>NesCre</sup>* females ( $n = 14-16$  females per genotype). \* $P < 0.05$  and \*\*\* $P < 0.001$  versus *ERβ<sup>fl/fl</sup>* mice. (B) Cumulative percentage of mice over time (days) with first oestrus is given for each genotype: *ERβ<sup>fl/fl</sup>*—open squares; *ERβ<sup>NesCre</sup>*—closed squares. (C) Uterine weight expressed as percentage of bw in female mice ( $n = 6-14$  females per age and per genotype). \* $P < 0.05$  and \*\* $P < 0.01$  versus corresponding *ERβ<sup>fl/fl</sup>* mice. (D) Ovary weight expressed as percentage of bw in female mice ( $n = 6-14$  females per age and per genotype). \* $P < 0.05$  versus corresponding *ERβ<sup>fl/fl</sup>* mice. (E) Body weight of female mice ( $n = 6-14$  females per age and per genotype) at postnatal days (P) 20, 25, 30, 35 and 60.

since the *NesCre* transgene alone, in the presence of wild-type *ERβ* alleles, had no effects on pubertal onset (Supplementary Material, Fig. S1A and B).

We then analysed the effects of *ERβ<sup>NesCre</sup>* invalidation on the weight of uterus, an oestrogen-responsive tissue usually used to indirectly monitor circulating oestradiol levels. Two-way ANOVA showed an effect of age ( $F_{(4,59)} = 33.9$ ,  $P < 0.0001$ ) and genotype ( $F_{(1,59)} = 20.1$ ,  $P < 0.0001$ ). Post-hoc analyses revealed a significant reduction in uterine weight at P30 and P35 in mutant females (Fig. 2C). Analysis of ovary weight indicated an effect of age ( $F_{(4,58)} = 22.53$ ,  $P < 0.0001$ ) but not of genotype ( $F_{(1,58)} = 0.54$ ,  $P > 0.05$ ), with post-hoc analyses showing a significant difference between controls and mutants at adulthood but not at postnatal stages (Fig. 2D).

The delayed pubertal maturation and uterine growth were not due to an effect of *ERβ<sup>NesCre</sup>* on body weight (bw) since comparison between control and mutant females showed an effect of age ( $F_{(3,63)} = 464.8$ ;  $P < 0.0001$ ) but not of genotype ( $F_{(1,63)} = 2.6$ ;  $P > 0.05$ ) (Fig. 2E). Analysis of body composition in live animals showed comparable percentage of fat mass and bone mineral density in control and mutant females (Supplementary Material, Fig. S2A and B).

### Kiss1 expression is selectively delayed in the postnatal preoptic area of *ERβ<sup>NesCre</sup>* females

We investigated by quantitative RT-PCR whether the *ERβ<sup>NesCre</sup>* mutation affected *Kiss1* expression. Kisspeptin neurons are located in two hypothalamic regions, namely the preoptic area and the MBH. Transcript levels normalized to glyceraldehyde 3-phosphate dehydrogenase gene (*GAPDH*) show that *Kiss1* expression increases progressively in the preoptic area of control females (5-fold at P25 and 8-fold at P30 versus P20; Fig. 3A).

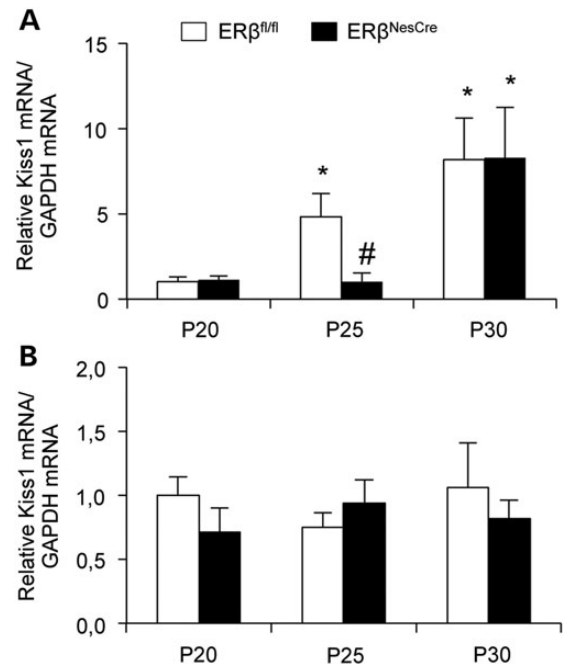

**Figure 3.** qRT-PCR analysis of *Kiss1* expression. (A and B) *Kiss1* gene expression normalized to *GAPDH* at postnatal (P) days 20, 25 and 30 in the preoptic area (A) and the MBH (B) for *ERβ<sup>fl/fl</sup>* and *ERβ<sup>NesCre</sup>* mice ( $n = 5-11$  females per age and per genotype). \* $P < 0.05$  compared to *ERβ<sup>fl/fl</sup>* females at P20. # $P < 0.05$  compared to *ERβ<sup>fl/fl</sup>* females at P25.

In contrast, in mutant females, *Kiss1* expression is unchanged at P25 compared with P20 and then shows a sharp increase by P30 (8-fold increase compared with P20) to reach a similar level to that of controls (Fig. 3A). A significant reduction is, indeed, seen at P25 between the two genotypes ( $P < 0.05$ ). In the MBH, there was no effect of age or genotype on *Kiss1* expression (Fig. 3B). In this brain area, we also analysed the expression of *tachykinin precursor 2 (TAC2)*, which encodes neurokinin B, another major regulator of GnRH neurons involved in pubertal maturation and co-expressed with *Kiss1* in cells of the arcuate (ARC) nucleus (31–33). Data did not show any effect of the  $ER\beta^{NesCre}$  mutation on *Tac2* mRNA levels at P25 (Supplementary Material, Fig. S3A). All these results were confirmed by using a second endogenous reference gene, *polymerase (RNA) II (DNA directed) polypeptide A (Polr2a)*, as is shown in Supplementary Material, Figure S3B–D.

The levels of GnRH transcripts were also analysed in the P25 preoptic area. Data show significantly ( $P < 0.01$ ) increased GnRH mRNAs levels normalized to GAPDH in mutant females ( $2.75 \pm 0.32$  versus  $1.00 \pm 0.19$  in controls).

#### Juvenile reduction of kisspeptin-immunoreactivity in the rostral periventricular area of the third ventricle (RP3V) of $ER\beta^{NesCre}$ females

Within the murine preoptic area, kisspeptin neurons are located along a periventricular area that crosses the anteroventral periventricular (AVPV), rostral (rPeN) and caudal (cPeN) preoptic periventricular nuclei; a region commonly referred to as the RP3V

(34). Immuno-histochemical analyses detected kisspeptin-immunoreactive cells in these three subdivisions of the RP3V at P25 in both control and mutant females (Fig. 4A). However, the number of kisspeptin-immunoreactive cells is significantly reduced in mutant females in comparison to controls (–72%, –64% and –57% in the AVPV, rPeN and cPeN, respectively; Fig. 4C). Within the murine MBH, kisspeptin neurons are concentrated in the ARC nucleus (Fig. 4B). Here, the mean density of kisspeptin-immunoreactivity does not differ significantly between controls and mutants in either the anterior or the posterior areas (Fig. 4D).

Dual labelling of GnRH shows unchanged numbers of GnRH-immunoreactive soma within the medial septum (MS), diagonal band of broca (DBB) and rostral preoptic area (rPOA) of mutant females (Fig. 5A and C). The mean density of fibre immunoreactivity in three levels of the median eminence (medial, caudal, rostral) is also comparable between the two genotypes (Fig. 5B and D).

#### Analysis of $ER\alpha$ expression at P25

Previous studies reported that  $ER\beta$  modulates  $ER\alpha$  gene expression (35). Since  $ER\alpha$  in kisspeptin cells is involved in pubertal onset (13,36), we therefore investigated whether central  $ER\beta$  deletion indirectly delayed pubertal maturation and kisspeptin expression by affecting  $ER\alpha$  expression.

In the preoptic area, the analysis of  $ER\alpha$  expression at P25 showed unchanged mRNA levels in mutant females compared

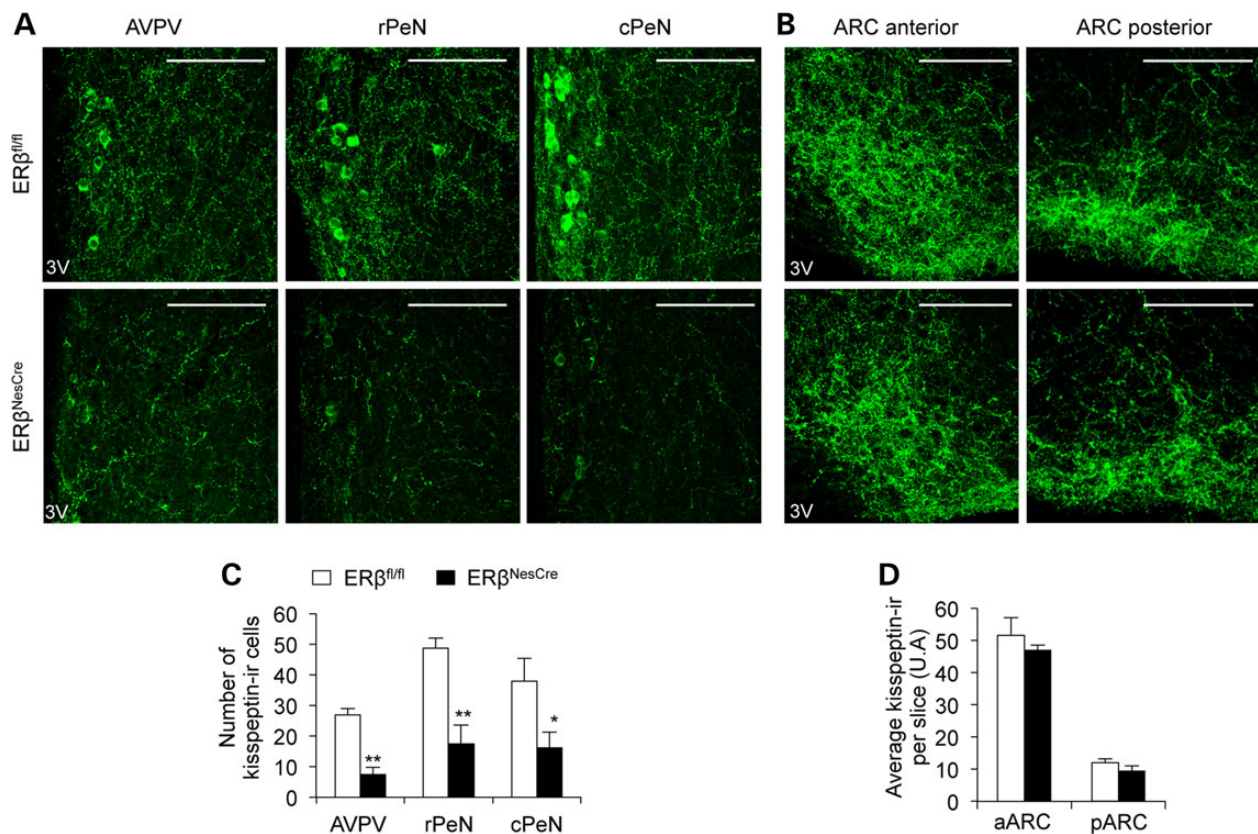

**Figure 4.** Kisspeptin-immunoreactivity at P25. (A and B) Representative kisspeptin-immunoreactivity in the AVPV area, the rostral (rPeN) and caudal (cPeN) periventricular nuclei of the RP3V (A) and in the anterior and posterior ARC nucleus (B) of  $ER\beta^{fl/fl}$  and  $ER\beta^{NesCre}$  mice. Scale bar = 100  $\mu$ m. (C and D) Quantification of the number of kisspeptin-immunoreactive (-ir) cells in the three RP3V subdivisions (C) and average kisspeptin-immunoreactivity in the anterior (aARC) and posterior (pARC) parts of the ARC nucleus (D) of  $ER\beta^{fl/fl}$  and  $ER\beta^{NesCre}$  mice ( $n = 6-7$  females per genotype), \* $P < 0.05$  and \*\* $P < 0.01$  versus controls for the corresponding area.

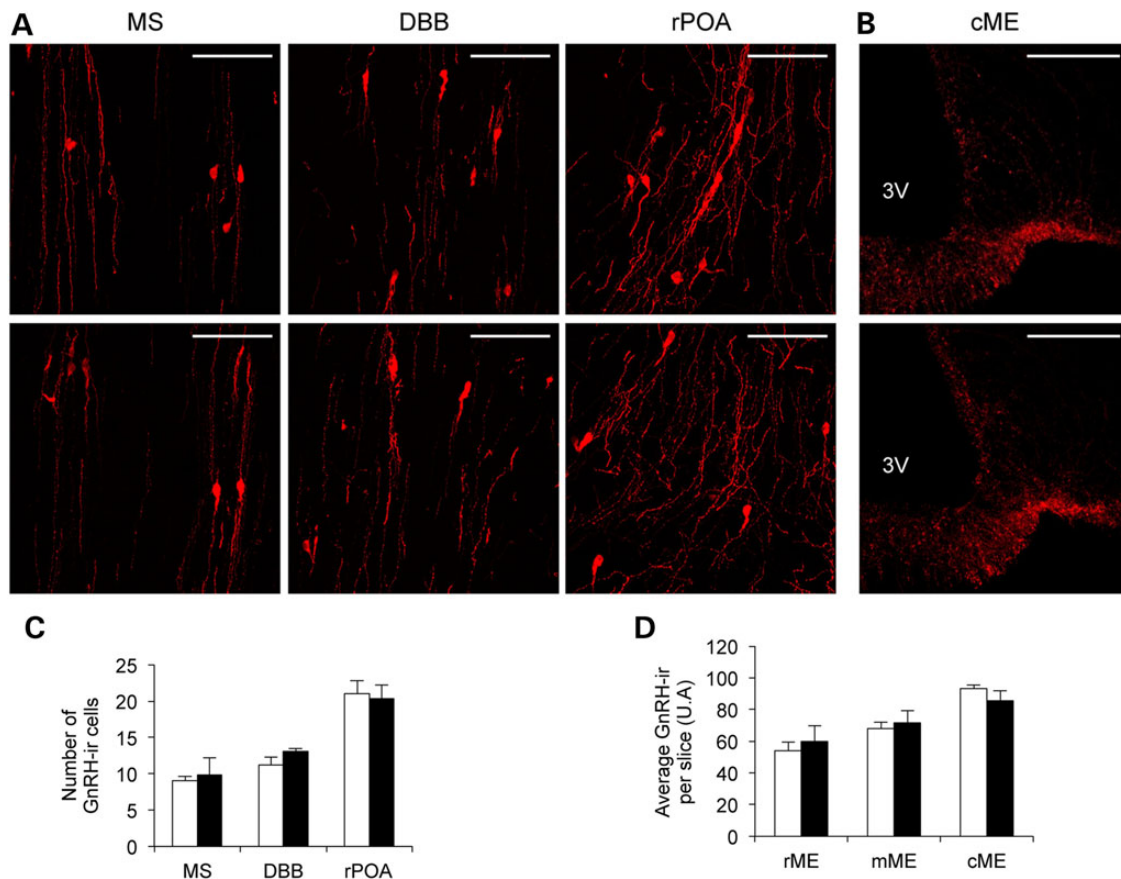

**Figure 5.** GnRH cell number and distribution, and fibre immunoreactivity at P25. (A and B) Representative GnRH-immunoreactive cells in the MS, DBB and rPOA (A) and fibre immunoreactivity in the caudal median eminence (B) of  $ER\beta^{fl/fl}$  and  $ER\beta^{NesCre}$  mice. Scale bar = 100  $\mu$ m. (C and D) Quantification of the number of GnRH-immunoreactive (-ir) cells in the MS, DBB and rPOA (C) and mean density of GnRH fibre immunoreactivity in the rostral (rME), medial (mME) and caudal (cME) areas of the median eminence (D). Values are means  $\pm$  S.E.M. of 4–6 females per genotype.

with their control littermates (Fig. 6A). In the MBH, a significant elevation (1.5-fold) is observed for  $ER\alpha$  mRNA levels in mutant females (Fig. 6B). These results were confirmed using the *Polr2a* endogenous reference gene (Supplementary Material, Fig. S3E and F).

To determine whether a similar increase occurred at the  $ER\alpha$  protein level, we performed an immuno-histochemical analysis of kisspeptin and  $ER\alpha$  in different sub-regions of the RP3V and ARC nucleus.  $ER\alpha$  is abundant in the RP3V at P25 (Fig. 6C). The total number of  $ER\alpha$ -immunoreactive cells is comparable between the two genotypes in the three RP3V subdivisions (Fig. 6D), whereas the number of neurons co-expressing kisspeptin and  $ER\alpha$  proteins is significantly reduced in mutant females compared with their control littermates ( $7.4 \pm 2.4$  versus  $25.3 \pm 2.0$  in the RP3V,  $17.3 \pm 6.0$  versus  $48.4 \pm 3.1$  in the rPeN and  $16.1 \pm 5.1$  versus  $37.6 \pm 7.5$  in the cPeN). Since 94–100% of kisspeptin neurons co-express  $ER\alpha$  regardless of genotype (Fig. 6E), the reduced number of cells co-expressing kisspeptin and  $ER\alpha$  may be attributed to decreased kisspeptin-immunoreactivity rather than to changes in the amounts of  $ER\alpha$  protein.

In the ARC nucleus, quantification of the total number of  $ER\alpha$ -immunoreactive cells and mean density of  $ER\alpha$ -immunoreactivity showed no differences between the two genotypes in either the anterior or the posterior regions at P25 (Supplemental Material, Fig. S4A–F). Similar results were found when other sub-regions of the MBH, such as the ventromedial hypothalamus, were analysed (data not shown).

### Adult $ER\beta^{NesCre}$ females exhibit normal reproduction and sexual behaviour but display altered anxiety-like behaviour

Examination of 2–3 months old females showed that the average length of the oestrous cycle ( $4.77 \pm 0.12$  and  $4.91 \pm 0.14$  days in control and mutant mice, respectively) and the mean length of each stage are comparable between  $ER\beta^{fl/fl}$  and  $ER\beta^{NesCre}$  mice (Fig. 7A). Levels of oestradiol were  $23.4 \pm 2.1$  pg/ml in controls and  $24.7 \pm 2.3$  pg/ml in mutants at the dioestrus stage. Analysis of circulating levels of LH in intact and ovariectomized (OVX) mice (Fig. 7B) showed an effect of ovariectomy ( $F_{(1,14)} = 17.90$ ,  $P < 0.001$ ) but not of genotype ( $F_{(1,14)} = 0.17$ ,  $P > 0.05$ ). In correlation with these data, no differences were found between controls and mutants concerning the number of kisspeptin-immunoreactive neurons in the RP3V, the density of kisspeptin-immunoreactivity in the ARC nucleus or the number of GnRH-positive cells within the rPeN preoptic area (Supplementary Material, Fig. S5A–E).

In behavioural tests, females were primarily screened for locomotor activity. No differences were shown between the two genotypes (data not shown). In the O-maze, there was an effect of both oestrous stage ( $F_{(1,62)} = 12.19$ ,  $P < 0.001$ ) and genotype ( $F_{(1,62)} = 8.96$ ,  $P < 0.01$ ) on the time spent in the open arms (Fig. 7C), with a significant interaction between both parameters ( $P < 0.001$ ). Similar effects of oestrous stage ( $F_{(1,61)} = 10.88$ ,  $P < 0.01$ ) and genotype ( $F_{(1,61)} = 9.46$ ,  $P < 0.01$ ) were observed for the number of entries in the open arms (Fig. 7D). During the follicular phase

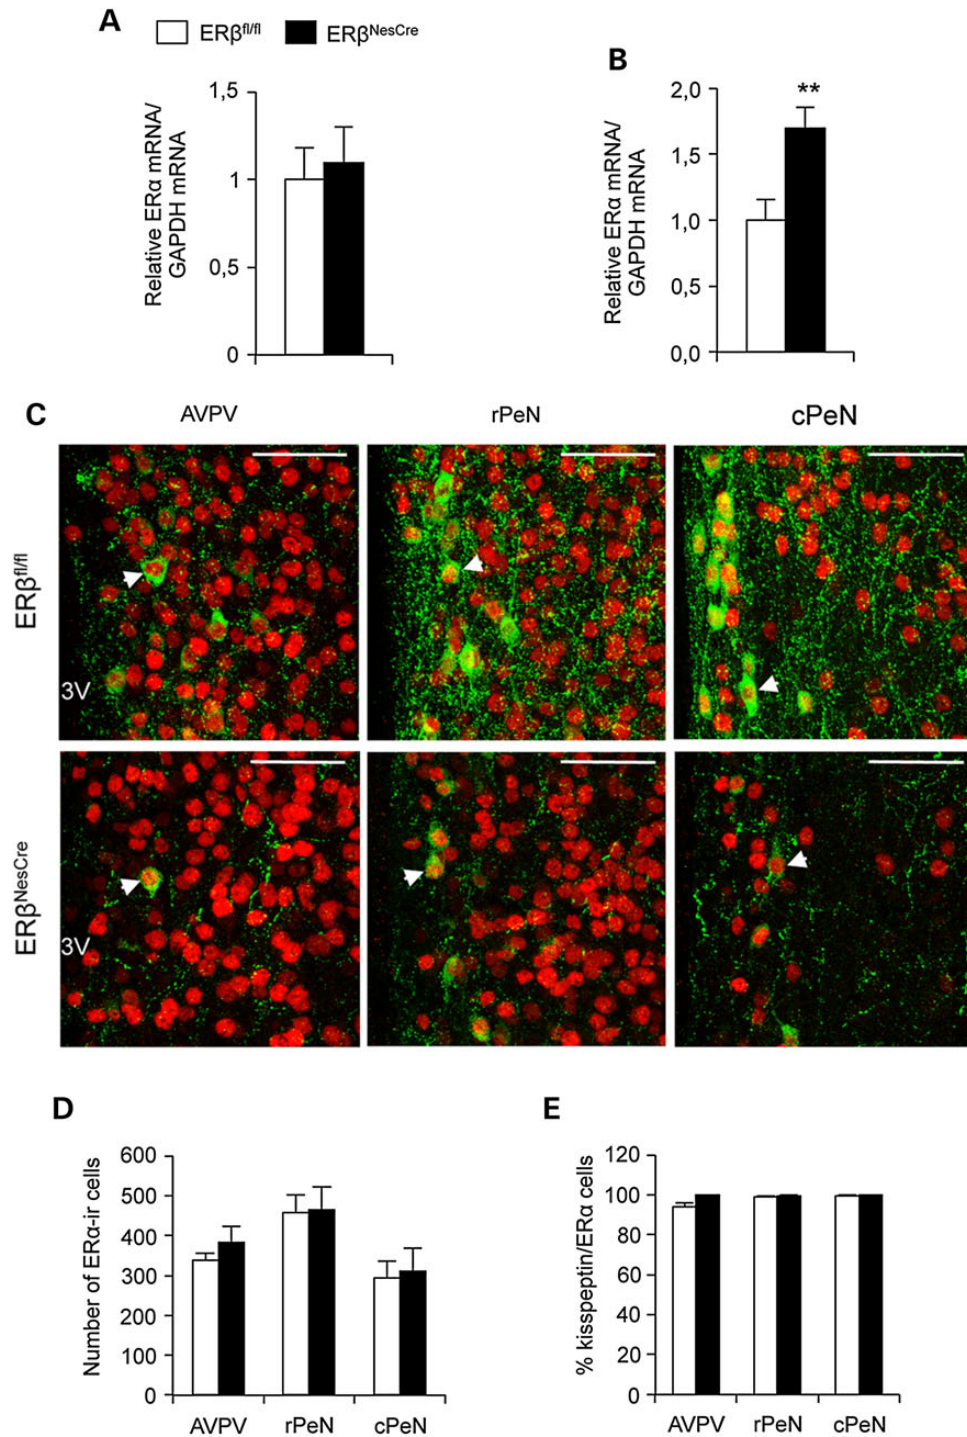

**Figure 6.** Analysis of ER $\alpha$  mRNAs expression and immunoreactivity at P25. (A and B) ER $\alpha$  expression normalized to GAPDH in the preoptic area (A) and the MBH (B) of ER $\beta^{fl/fl}$  and ER $\beta^{NesCre}$  females ( $n = 6-13$  females per genotype). \*\* $P < 0.01$  versus ER $\beta^{fl/fl}$  females. (C) Representative immuno-labelling of kisspeptin (green) and ER $\alpha$  cells (red) within the AVPV, rPeN and cPeN. White arrows show typical kisspeptin and ER $\alpha$  co-labelled cells. Scale bar = 50  $\mu$ m. (D and E) Number of ER $\alpha$ -immunoreactive (-ir) cells (D) and percentage of cells co-labelled for kisspeptin and ER $\alpha$  (E) in the AVPV, rPeN and cPeN areas ( $n = 6-7$  females per genotype for each region).

(pro-oestrous, oestrous), mutant females spent less time in the open arms compared with their control littermates, thereby revealing an increased anxiety level at this period.

Analysis of the lordosis posture in OVX females primed with oestradiol/progesterone showed a significant effect of experience ( $F_{(1,15)} = 20.057$ ,  $P < 0.001$ ) but no effect of genotype ( $F_{(1,15)} = 0.36$ ,

$P > 0.05$ ) on the lordosis quotient (Fig. 7E). In olfactory preference tests, there was a significant effect of stimulus ( $P < 0.05$ ) but not of genotype, with all females displaying a preference for an intact male over a receptive female (Fig. 7F). In 4-months continuous mating, control and mutant females produced offspring with comparable litter size ( $3.7 \pm 0.3$  and  $4.0 \pm 0.6$ ,

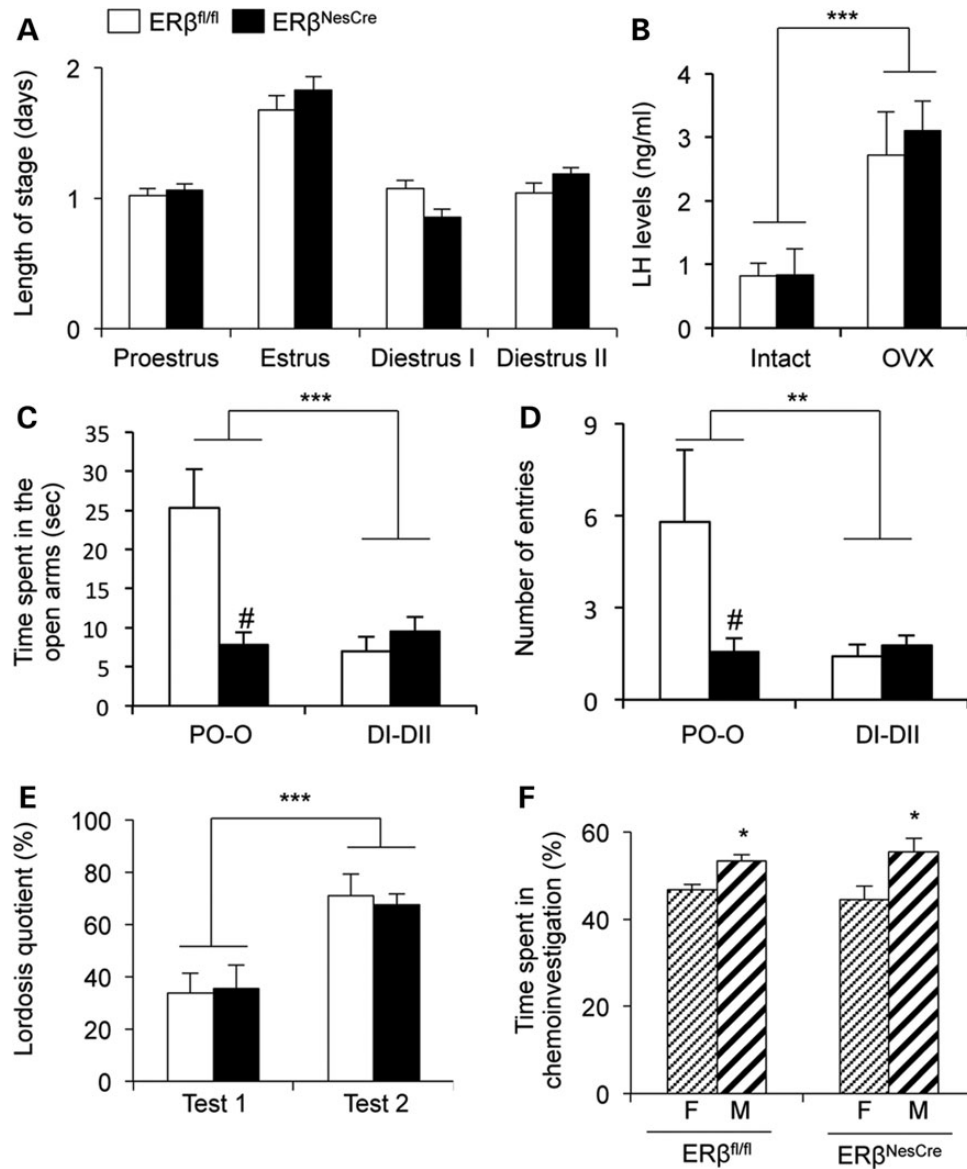

**Figure 7.** Oestrous cyclicity, hormone levels and behaviours in adult females. (A) The average number of days for each oestrous cycle stage ( $n = 13\text{--}14$  females per genotype). (B) Levels of circulating oestradiol in intact and OVX mice ( $n = 5$  females per genotype and treatment). \*\*\* $P < 0.001$  versus intact females. (C and D) Time spent in the open arms (C) and number of entries (D) of the O-maze in females at the prooestrous-oestrous (PO-O) or the dioestrous (DI-DII) stage ( $n = 10\text{--}26$  females per genotype and stage). \*\*\* $P < 0.001$ , \*\* $P < 0.001$ , versus the PO-O stage. # $P < 0.01$  versus ERβ<sup>fl/fl</sup> females at the same oestrous stage. (E) Lordosis quotient of females ( $n = 9\text{--}11$  per genotype) in response to mounts of stud males in Tests 1 and 2. \*\*\* $P < 0.001$  versus Test 1. (F) Percentage of time spent chemoinvestigating male (M) or female (F) stimuli ( $n = 8\text{--}10$  females per genotype). \* $P < 0.05$  versus female stimulus.

respectively) and total number of pups ( $29.7 \pm 4.3$  and  $28.7 \pm 2.9$ , respectively).

## Discussion

Central ERβ deletion in female mice delayed pubertal onset assessed by vaginal opening, first oestrous and uterine growth. This phenotype was associated with normal body growth of mutant females and body fat composition, indicating that the metabolic processes widely known to trigger pubertal onset were not implicated here. As a first approach to investigate the downstream molecular changes that occurred in the brain following central ERβ deletion, we focussed on the analysis of Kiss1, a gene necessary for pubertal progression (26,27).

In the preoptic area of control female mice, the expression of Kiss1 mRNA started to increase before vaginal opening or the first oestrous. This finding extends previous observations made in rats (37,38). In mutant mice, Kiss1 expression also increased between P20 and P30 in the preoptic area, but with a significant delay compared with controls. At P25, Kiss1 mRNA levels were significantly reduced compared with control mice. This transient reduction in Kiss1 transcripts also translated as changes at the protein level since the number of kisspeptin-immunoreactive neurons was greatly reduced in the three RP3V subdivisions of mutant females at P25. The delayed vaginal opening, first oestrous and uterine growth observed in mutant females were preceded by a delayed increase in Kiss1 expression in the RP3V. It is therefore possible that central ERβ deletion delayed female

puberty by altering *Kiss1* expression in the RP3V. The importance of *Kiss1* expression in this specific brain area for pubertal onset is supported by a recent study showing that siRNA-mediated knockdown of *Kiss1* in the AVPV, but not in the ARC nucleus, delays vaginal opening and first oestrous (39).

In the MBH of control females, another site of *Kiss1* up-regulation during the peri-pubertal period in several species (37,40,41), we were unable to detect any changes in *Kiss1* transcript levels between P25 and P30. Whether this is the reflection of a major species difference in the anatomical site of *Kiss1* regulation at the onset of puberty, or of an insufficient methodological sensitivity specific to the mouse model, requires further clarification (42,43). In mutant females, *Kiss1* mRNAs levels in the MBH and fibre immunoreactivity in both the anterior and posterior regions of the ARC nucleus were unaltered. *Tac2* expression was also unchanged in this nucleus. Altogether, these data suggest that central ER $\beta$  mediates the timely up-regulation of *Kiss1* expression by oestradiol in the prepubertal RP3V specifically, and that this increase is necessary for puberty onset.

ER $\beta$  has been shown to modulate ER $\alpha$  expression in both an enhancing and a suppressing fashion (35). Data showed no changes in ER $\alpha$  mRNA levels in the preoptic area or immunoreactivity in the RP3V of mutant females, indicating that the observed phenotype was not due to changes in ER $\alpha$  expression in this brain area. In the MBH of P25 mutant mice, where *Kiss1* and *Tac2* expression were unaffected compared with control mice, a significant increase in ER $\alpha$  transcripts was detected. The number of ER $\alpha$ -immunoreactive cells and mean grey value of ER $\alpha$  immunoreactivity were, however, unchanged between control and mutant females in the major sites of ER $\alpha$ -expression within the MBH (ARC, VMH). Alterations in mRNA levels generally precede those of proteins; it is therefore possible that enhancement of ER $\alpha$  protein amount occurs later in the prepubertal MBH of mutant females although the physiological meaning of such changes remain to be clarified.

The two nuclear ER $\alpha$  and ER $\beta$  exhibit different ligand-binding specificity and transcriptional activities and appear to act in an opposite way in the regulation of target genes in several *in vitro* and *in vivo* models (44–48). Whether ER $\alpha$  and ER $\beta$ , which are co-expressed in a significant proportion of *Kiss1*-expressing cells (49), act in a similar fashion in the RP3V needs further investigation. Nevertheless, it is interesting to note that ER $\alpha$  deletion in kisspeptin cells advanced (13,36), whereas the present central ER $\beta$  deletion delayed pubertal maturation. A possible explanation could be that central ER $\beta$  deletion, by altering the ratio of ER expression levels, promoted ER $\alpha$  signalling and consequently resulted in delayed puberty onset. Therefore, the pubertal phenotype induced by the central deletion of ER $\beta$  could be rather related to changes in the ‘Ying Yang’ relationship between ER $\alpha$  and ER $\beta$ , which in turn may affect the timing of kisspeptin increase in this brain area.

We analysed the effects of central ER $\beta$  invalidation on GnRH cell number, distribution and expression. Quantification of the number of GnRH cell bodies in the MS, DBB and preoptic area showed comparable results between control and mutant mice. This indicates that the early deletion of central ER $\beta$  does not interfere with GnRH cell number or distribution. Quantification of GnRH mRNA showed significantly higher levels in mutant females at P25. This may result from a direct effect of ER $\beta$  deletion on GnRH neurons. Previous studies reported the presence of ER $\beta$  transcripts and protein in rat GnRH neurons (50,51). In mice, immuno-histochemical data should be cautiously interpreted due to the lack of antibodies specific enough against this receptor (52), but *in vitro* studies reported negative regulation of GnRH

expression by an ER $\beta$  agonist in mouse hypothalamic GT1-7 cells (53). Changes in GnRH expression may also be due to reduced kisspeptin expression, which by decreasing GnRH liberation, could result in the accumulation of GnRH mRNAs in cell bodies. Analysis of GnRH fibre immunoreactivity by confocal microscopy in the median eminence did not depict any difference between the two genotypes, suggesting either a delayed increase in GnRH peptide amount or rather a post-transcriptional adjustment of GnRH peptide levels. Female mice lacking ER $\beta$  in GnRH cells, recently generated by Herbison’s laboratory (12), have been characterized at adulthood but not yet during the post-natal/prepubertal period. Further characterization of these mice during development will allow an interesting comparison with our model and may help clarifying the cellular pathways used by ER $\beta$  in the prepubertal regulation of GnRH expression. Whatever the mechanism underlying increased GnRH mRNA levels, it did not rescue the pubertal delay induced by ER $\beta$ <sup>NesCre</sup> mutation. This suggests that the alteration of kisspeptin system might be the primary factor responsible for this phenotype in ER $\beta$ <sup>NesCre</sup> mice.

Central ER $\beta$  deletion did not alter reproductive functions of adult females as shown by normal oestrous cyclicity, oestradiol and LH levels. This finding extends a recent study, which shows that neuronal ablation of ER $\beta$  in the forebrain results in normal oestrous cyclicity of adult females (12). However, while this work reported a minor failure in the negative feedback exerted by oestradiol on LH secretion, we found a comparable enhancement in LH levels after ovariectomy in mutant and control females. We also found that sexual behaviour, assessed in OVX and hormonally-primed females, was unaffected in naïve and sexually experienced mutants. The discrepancy with the global ER $\beta$  deletion, which results in both impaired sexual behaviour (54) and infertility (15), suggests that the primary sites of ER $\beta$  action in these processes at adulthood might be the ovary. Indeed, a very recent study using ovary transplantation from wild-type to ER $\beta$ -null mice and *vice versa* showed that ER $\beta$  within the ovary is required in normal LH surge and fertility (55). Disruption of ovarian ER $\beta$ , by altering postnatal synthesis and liberation of oestradiol, can also indirectly interfere with the expression of sexual behaviour since the feminization of the neural circuitry underlying this behaviour is under the control of postnatal/prepubertal oestradiol (56). Nevertheless, as our analyses were performed on young adult female mice, one cannot exclude later effects of the early deletion of central ER $\beta$  on the reproductive capacity at advanced age. For instance, ovary weight, while unaffected at postnatal stages, was significantly decreased by 22% in adult mutant females.

The altered anxiety state during the follicular phase of the oestrous cycle is reminiscent to that previously reported in global ER $\beta$  knockout mice (30). The present study further emphasizes the importance of central ER $\beta$  in the anxiolytic effect induced by oestradiol during this period. The downstream molecular pathways may involve the serotonergic system and tryptophan hydroxylase expression in the dorsal raphe nucleus (57). Whether these anxiety disorders take their origin during the prepubertal/pubertal period needs further investigation.

In summary, we provide here the first genetic evidence that central ER $\beta$  is involved in the regulation of postnatal *Kiss1* expression in the RP3V and in the timing of pubertal maturation in female mice. The suppression of this signalling pathway delays, but does not inhibit, *Kiss1* expression. We suggest that a tight control of pubertal timing by oestradiol requires both ER $\beta$  and ER $\alpha$ , which may function in opposite ways. Postnatal oestradiol might first exert, through ER $\alpha$ , an inhibitory tone on kisspeptin



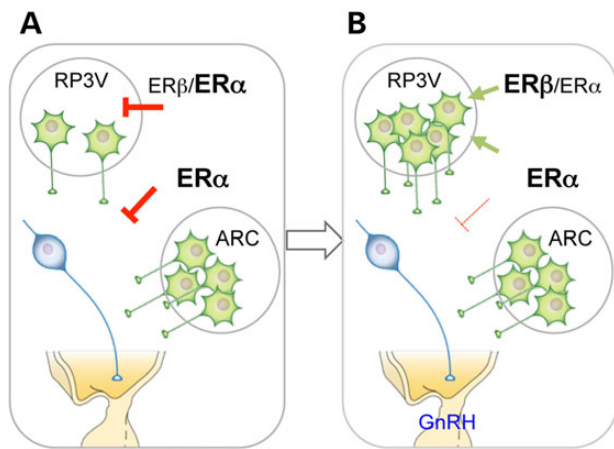

**Figure 8.** Schematic representation of the potential role of the ER $\beta$  signalling pathway in oestradiol-induced pubertal maturation. (A) During the postnatal period, oestradiol may maintain through ER $\alpha$  an inhibitory effect on kisspeptin expression in the RP3V and kisspeptin neuron activity in the ARC nucleus (full red lines). (B) The emergence of ER $\beta$  signalling pathway during the prepubertal period may counteract ER $\alpha$  effects by promoting kisspeptin expression in the RP3V (green arrow). A stimulatory phase would follow, involving reinforcement or potentiation of kisspeptin expression in the RP3V and decreased sensitivity to the ER $\alpha$ -mediated inhibition (dashed red lines), which then participate to trigger GnRH secretion. Kisspeptin neurons are illustrated in green and GnRH cells in blue.

expression and/or neuronal activity. The emergence of prepubertal ER $\beta$  signalling due to increased production of ovarian oestradiol and/or increased expression of ER $\beta$  (58) or downstream components, would promote Kiss1 expression in the RP3V (Fig. 8). This positive input might thereafter be followed by decreased inhibition exerted by ER $\alpha$  on kisspeptin cell activity (13,36) and by other processes including activation of neuro-glial networks underpinning pubertal maturation (59). The possible cooperation between ER $\alpha$  and ER $\beta$  signalling pathways in oestradiol-induced pubertal maturation is in good agreement with a human study showing that combined polymorphism of both ER $\alpha$  and ER $\beta$  might influence the age of menarche in girls (9). Analyses of these interactions in transgenic models may help to better understand the physiological mechanisms underlying the regulation of puberty onset and predict the potential effects of exposure to molecules with oestrogenic or anti-oestrogenic activities.

## Materials and Methods

### Animals

All experiments were performed in agreement with the European guidelines for the use of experimental animals (Decree 87-848, 86/609/ECC). Littermates were group-housed under a controlled photoperiod (12:12-h light–dark cycle—lights on at 7 am), maintained at 22°C, with free access to food and water.

### Generation and genotyping of ER $\beta$ <sup>NesCre</sup> mouse line

Control and mutant females were obtained in the same litters in a C57BL/6J genetic background by crossing females in which exon 3 of ER $\beta$  was flanked by loxP sites (15), with floxed ER $\beta$  males expressing Cre recombinase under the control of the nestin promoter (NesCre) and a neural enhancer (28,60). As previously reported, Cre-mediated excision of floxed exon 3 of the ER $\beta$  gene allows the deletion of all ER $\beta$  transcripts (15). The used

NesCre transgene permits such deletion in neural precursor cells by embryonic day 10.5, before gonadal differentiation (60). The selective ER $\beta$  deletion was determined by PCR as previously described (15,28). RT-PCR was carried on total RNAs (2  $\mu$ g) extracted from the ovary and brain using the Superscript III first strand Synthesis System (Invitrogen). PCR reactions were performed using the resulting cDNA, Taq DNA pol (In vitrogen), dNTPs (10 nM each) and primers for ER $\beta$  (15) or GAPDH in a MyCycler Thermal Cycler (Bio Rad, Marne la Coquette, France). The amplified cDNA fragments were separated by electrophoresis through a 1.5% agarose gel and stained by ethidium bromide.

### Reproductive physiology

Female mice were examined daily for evidence of vaginal opening and first oestrus from postnatal day 15. Vaginal smears flushed with physiological saline were taken from juvenile mice to determine the day of first oestrus and from adult females (2–3 months of age) for 3–4 weeks to assess oestrous cyclicity. The oestrous cycle phase was identified by microscopy after hematoxylin-eosin coloration of the vaginal smears. Body and uterine weights of juvenile and adult mice were measured. Levels of circulating oestradiol and LH were analysed using RIA (ultra-sensitive oestradiol kit; Beckman Coulter, Villepinte, France) and immunoassay (ultra-sensitive Elisa kit; Endocrine Technologies, Newark, CA, USA), respectively, as previously described (28,61). Bone mineral density and percentage of fat mass were determined by using a Piximus densitometer (Lunar Corporation).

### Quantitative RT-PCR

Fresh mice brains were rapidly embedded in Tissue-Tek, frozen in a –30°C isopentane solution and stored at –80°C until use. Frozen tissue punches were recovered through the preoptic area and MBH with a 1 mm diameter canula. These tissue punches encompassed respectively the RP3V and the ARC nucleus where kisspeptin neurons are located. Total RNA was extracted using the PicoPure RNA isolation kit from Arcturus (Exilone SARRL, Vicq, France). RNA was reverse transcribed using the Promega kit (Charbonnière les Bains, France). Real-time PCR analysis was performed using iQ SYBR Green Supermix (Biorad, Hercules, CA, USA). The PCR reaction was performed using primers previously described for Kiss1 (62), Polr2r (63), GnRH and GAPDH (64), ER $\alpha$  (65) and TAC2 (66). Two different endogenous reference genes were chosen for their insignificant variation across experimental groups: GAPDH and Polr2a. PCR specificity was verified by melting curve analysis and agarose gel electrophoresis. For each assay, a standard curve was created using 2-fold serial dilutions of cDNA, from which PCR efficiencies for each gene were calculated. All experiments had efficiencies between 90 and 106%. Each sample was run in triplicate to obtain an average cycle threshold (Ct) value and relative expression of each target gene was determined using the comparative Ct method (67). The data were normalized to either GAPDH or Polr2a expression levels. Results were expressed as fold differences in relative gene expression with respect to ER $\beta$ <sup>fl/fl</sup> mice at P20 or P25.

### Immunohistochemistry

Coronal sections (30  $\mu$ m) from female brains at P25 or adulthood (2–3 months of age) were prepared for immunohistochemistry as previously described (61). For dual-label immunofluorescence kisspeptin/ER $\alpha$  or kisspeptin/GnRH, sections were blocked for 30 min with 2% normal donkey serum (Aurion, Wageningen, Netherlands)

in phosphate buffered saline (PBS) containing 0.3% Triton X-100 and 0.1% human albumin, then incubated with sheep anti-kisspeptin antibody AC053 [1:10 000; (68)] and either rabbit anti-ER $\alpha$  antibody (1:250; Santa Cruz Biotechnology, Dallas, USA) or rabbit anti-GnRH #19900 [1:10 000; (69)] for 72 h at 4°C. Dual-label immunofluorescence was carried out for 2 h at room temperature using an Alexa Fluor 488-conjugated donkey anti-sheep secondary antibody (1:500; Life Technologies) and an Alexa Fluor 555-conjugated donkey anti-rabbit secondary antibody (1:500; Life Technologies) for kisspeptin and GnRH or ER $\alpha$  immunostaining, respectively. After rinses in PBS, sections were immersed in a Hoechst stain bath (2  $\mu$ g/ml in water; Invitrogen) for 5 min, rinsed again in PBS, dried and mounted with fluoromount G (Southern Biotech, Birmingham, AL, USA) under a coverslip.

The number of kisspeptin-immunoreactive cells was counted in anatomically matched section of the AVPV nucleus (plates 28–29 of the Mouse Brain Atlas of Paxinos et Franklin (70); two sections per animal) and the rostral (plate 30; two sections per animal) and caudal (plates 31–32; two sections per animal) regions of the RP3V as previously described (61). Total kisspeptin-immunoreactivity (voxel counts) was carried out on anatomically matched sections of the anterior (plate 44; one section per animal) and posterior (plate 51; one section per animal) areas of the ARC nucleus. Quantification of GnRH-immunoreactive cell bodies was carried out on two anatomically matched sections selected at the level of the MS (plate 22), the DBB (plate 24) and the rPOA (plate 26). Total GnRH immunoreactivity was carried out on three anatomically matched sections of the rostral, medial and caudal levels of the median eminence (plates 45, 47 and 49, one section per animal) within an area of 100  $\times$  30  $\mu$ m. ER $\alpha$  immunoreactive neurons were counted at the three subdivisions of the RP3V. All cells within 100  $\mu$ m of the ventricle were counted. Two brain sections at each level of the RP3V were analysed in each mouse. The number of ER $\alpha$  immunoreactive neurons was also counted at the anterior and posterior levels of the ARC nucleus within an area of 200  $\times$  150  $\mu$ m, and at the level of the ventromedial nucleus within an area of 400  $\times$  300  $\mu$ m (plate 44; one section per animal). Dual-label immuno-cyto-chemical analysis of ER $\alpha$  and kisspeptin co-expression was carried out at the three levels of the RP3V. Double labelled neurons were identified as clearly exhibiting a green cytoplasm and a red nucleus.

## Behaviours

### Locomotor activity and O-maze tests

Females were primarily screened for locomotor activity in a computed circular corridor as previously described (28). Briefly, mice were introduced in a circular corridor made of two concentric cylinders crossed by four diametrically opposite infrared beams (Imetronic, Pessac, France). The locomotor activity was counted when animals interrupted two successive beams and thus had travelled a quarter of the circular corridor.

The anxiety state was measured in the O-maze paradigm (56 cm diameter, 5.5 cm width, 65 cm height). Two parts of the device, each representing a quarter of the ring, were enclosed by walls (17 cm height). At the beginning of the test, females (2–3 months of age) were placed in the closed arm. The number of entries and time spent in the open arms were recorded for 9 min. Vaginal smears were taken for 2 weeks before the test in order to determine the stage of the oestrus cycle on the day of experiment. According to the result, females were separated into two groups: females in proestrus/oestrous of the follicular phase (high oestradiol levels) and females in dioestrous of the luteal phase (low oestradiol levels).

## Sexual behaviour

Females (2–3 months of age) were OVX under general anaesthesia and supplemented with subcutaneous Silastic implants containing 50  $\mu$ g of oestradiol benzoate (Sigma-Aldrich) in 30  $\mu$ l sesame oil as previously reported (28). Two weeks later, females were given a subcutaneous injection of 1 mg progesterone (Sigma-Aldrich) in 100  $\mu$ l sesame oil 4–5 h before the mating test. Animals were tested twice, with an interval of 1 week between tests. Sexually experienced males were used as partners. Tests ended when females had received 20 mounts from males. The lordosis quotient was calculated for each subject in response to male mounting (61).

Olfactory preference was tested in an enclosed Plexiglas Y-maze. Females were allowed to adapt to the apparatus without any stimuli for 5 min on two consecutive days. On the third day, they were tested by placing an anaesthetized receptive female and gonadally intact male in the boxes, one at the distal end of each arm. The time spent sniffing each goal box was scored over the 5-minute test. Results were expressed as a percentage of the total time spent sniffing male and female cues. The maze was cleaned with 10% ethanol between trials.

## Statistics

Data were expressed as mean  $\pm$  S.E.M. Student's t-tests were used to determine the effect of genotype on ER $\beta$  expression, the time of vaginal opening and first oestrous, oestradiol levels and on body composition. For gene expression analysis, univariate t-tests were used, taking the value of 1 for controls as the theoretical average. As variances were not homogeneous between groups, kisspeptin, GnRH and ER $\alpha$  immunoreactivity as well as fertility were analysed with the Mann-Whitney nonparametric test. Two-way ANOVA was used to analyse the main effects of genotype and age on body and uterine weights, genotype and ovariectomy on LH levels, genotype and oestrous stage on oestrous cyclicity and anxiety-like behaviour, genotype and experience on lordosis behaviour or genotype and stimulus on olfactory preference. Tukey post-hoc tests were used to determine group differences. P-values of less than 0.05 were considered to be significant.

## Supplementary Material

Supplementary Material is available at HMG online.

## Acknowledgements

We thank Professor Pierre Chambon (Institut de Génétique et de Biologie Moléculaire et Cellulaire, Illkirch 67404, France) for providing the floxed ER $\beta$  mouse line.

*Conflict of Interest statement.* None declared.

## Funding

This research was supported by grants from the 'Programme Blanc SVSE 7-2012' of the 'Agence Nationale de la Recherche', INSERM, CNRS and UPMC.

## References

1. Palmert, M.R. and Boeppel, P.A. (2001) Variation in the timing of puberty: clinical spectrum and genetic investigation. *J. Clin. Endocrinol. Metab.*, **86**, 2364–2368.
2. Parent, A.-S., Teilmann, G., Juul, A., Skakkebaek, N.E., Toppari, J. and Bourguignon, J.-P. (2003) The timing of normal puberty

- and the age limits of sexual precocity: variations around the world, secular trends, and changes after migration. *Endocr. Rev.*, **24**, 668–693.
3. Crain, D.A., Janssen, S.J., Edwards, T.M., Heindel, J., Ho, S., Hunt, P., Iguchi, T., Juul, A., McLachlan, J.A., Schwartz, J. et al. (2008) Female reproductive disorders: the roles of endocrine-disrupting compounds and developmental timing. *Fertil. Steril.*, **90**, 911–940.
  4. Mendola, P., Messer, L.C. and Rappazzo, K. (2008) Science linking environmental contaminant exposures with fertility and reproductive health impacts in the adult female. *Fertil. Steril.*, **89**, e81–e94.
  5. Parent, A.-S., Franssen, D., Fudvoye, J., Gérard, A. and Bourguignon, J.-P. (2015) Developmental variations in environmental influences including endocrine disruptors on pubertal timing and neuroendocrine control: revision of human observations and mechanistic insight from rodents. *Front Neuroendocrinol.*, **38**, 12–36.
  6. Boot, A.M., van der Sluis, I.M., de Muinck Keizer-Schrama, S. M., van Meurs, J.B., Krenning, E.P., Pols, H.A. and Uitterlinden, A.G. (2004) Estrogen receptor alpha gene polymorphisms and bone mineral density in healthy children and young adults. *Calcif. Tissue Int.*, **74**, 495–500.
  7. Gorai, I., Tanaka, K., Inada, M., Morinaga, H., Uchiyama, Y., Kikuchi, R., Chaki, O. and Hirahara, F. (2003) Estrogen-metabolizing gene polymorphisms, but not estrogen receptor-alpha gene polymorphisms, are associated with the onset of menarche in healthy postmenopausal Japanese women. *J. Clin. Endocrinol. Metab.*, **88**, 799–803.
  8. Long, J.-R., Xu, H., Zhao, L.-J., Liu, P.-Y., Shen, H., Liu, Y.-J., Xiong, D.-H., Xiao, P., Liu, Y.-Z., Dvornyk, V. et al. (2005) The oestrogen receptor alpha gene is linked and/or associated with age of menarche in different ethnic groups. *J. Med. Genet.*, **42**, 796–800.
  9. Stavrou, I., Zois, C., Chatzikiyriakidou, A., Georgiou, I. and Tsatsoulis, A. (2006) Combined estrogen receptor alpha and estrogen receptor beta genotypes influence the age of menarche. *Hum. Reprod.*, **21**, 554–557.
  10. Weel, A.E., Uitterlinden, A.G., Westendorp, I.C., Burger, H., Schuit, S.C., Hofman, A., Helmerhorst, T.J., van Leeuwen, J.P. and Pols, H.A. (1999) Estrogen receptor polymorphism predicts the onset of natural and surgical menopause. *J. Clin. Endocrinol. Metab.*, **84**, 3146–3150.
  11. Mendoza, N., Morón, F.J., Quereda, F., Vázquez, F., Rivero, M. C., Martínez-Astorquiza, T., Real, L.M., Sánchez-Borrego, R., González-Pérez, A. and Ruiz, A. (2008) A digenic combination of polymorphisms within ESR1 and ESR2 genes are associated with age at menarche in the Spanish population. *Reprod. Sci.*, **15**, 305–311.
  12. Cheong, R.Y., Porteous, R., Chambon, P., Abrahám, I. and Herbison, A.E. (2014) Effects of neuron-specific estrogen receptor (ER)  $\alpha$  and ER $\beta$  deletion on the acute estrogen negative feedback mechanism in adult female mice. *Endocrinology*, **155**, 1418–1427.
  13. Mayer, C., Acosta-Martinez, M., Dubois, S.L., Wolfe, A., Radovick, S., Boehm, U. and Levine, J.E. (2010) Timing and completion of puberty in female mice depend on estrogen receptor alpha-signaling in kisspeptin neurons. *Proc. Natl. Acad. Sci. USA*, **107**, 22693–22698.
  14. Wintermantel, T.M., Campbell, R.E., Porteous, R., Bock, D., Gröne, H.-J., Todman, M.G., Korach, K.S., Greiner, E., Pérez, C. A., Schütz, G. et al. (2006) Definition of estrogen receptor pathway critical for estrogen positive feedback to gonadotropin-releasing hormone neurons and fertility. *Neuron*, **52**, 271–280.
  15. Antal, M.C., Krust, A., Chambon, P. and Mark, M. (2008) Sterility and absence of histopathological defects in nonreproductive organs of a mouse ERbeta-null mutant. *Proc. Natl. Acad. Sci. USA*, **105**, 2433–2438.
  16. Dupont, S., Krust, A., Gansmuller, A., Dierich, A., Chambon, P. and Mark, M. (2000) Effect of single and compound knockouts of estrogen receptors alpha (ERalpha) and beta (ERbeta) on mouse reproductive phenotypes. *Development*, **127**, 4277–4291.
  17. Kregge, J.H., Hodgin, J.B., Couse, J.F., Enmark, E., Warner, M., Mahler, J.F., Sar, M., Korach, K.S., Gustafsson, J.A. and Smithies, O. (1998) Generation and reproductive phenotypes of mice lacking estrogen receptor beta. *Proc. Natl. Acad. Sci. USA*, **95**, 15677–15682.
  18. Shughrue, P.J., Askew, G.R., Dellovade, T.L. and Merchenthaler, I. (2002) Estrogen-binding sites and their functional capacity in estrogen receptor double knockout mouse brain. *Endocrinology*, **143**, 1643–1650.
  19. Azcoitia, I., Sierra, A. and Garcia-Segura, L.M. (1999) Localization of estrogen receptor beta-immunoreactivity in astrocytes of the adult rat brain. *Glia*, **26**, 260–267.
  20. Shughrue, P.J., Lane, M.V. and Merchenthaler, I. (1997) Comparative distribution of estrogen receptor-alpha and -beta mRNA in the rat central nervous system. *J. Comp. Neurol.*, **388**, 507–525.
  21. Brock, O. and Bakker, J. (2013) The two kisspeptin neuronal populations are differentially organized and activated by estradiol in mice. *Endocrinology*, **154**, 2739–2749.
  22. Clarkson, J., Boon, W.C., Simpson, E.R. and Herbison, A.E. (2009) Postnatal development of an estradiol-kisspeptin positive feedback mechanism implicated in puberty onset. *Endocrinology*, **150**, 3214–3220.
  23. Kirilov, M., Clarkson, J., Liu, X., Roa, J., Campos, P., Porteous, R., Schütz, G. and Herbison, A.E. (2013) Dependence of fertility on kisspeptin-Gpr54 signaling at the GnRH neuron. *Nat. Commun.*, **4**, 2492.
  24. Messenger, S., Chatzidaki, E.E., Ma, D., Hendrick, A.G., Zahn, D., Dixon, J., Thresher, R.R., Malinge, I., Lomet, D., Carlton, M.B.L. et al. (2005) Kisspeptin directly stimulates gonadotropin-releasing hormone release via G protein-coupled receptor 54. *Proc. Natl. Acad. Sci. USA*, **102**, 1761–1766.
  25. Novaira, H.J., Sonko, M.L., Hoffman, G., Koo, Y., Ko, C., Wolfe, A. and Radovick, S. (2014) Disrupted kisspeptin signaling in GnRH neurons leads to hypogonadotrophic hypogonadism. *Mol. Endocrinol.*, **28**, 225–238.
  26. Clarkson, J. (2013) Effects of estradiol on kisspeptin neurons during puberty. *Front Neuroendocrinol.*, **34**, 120–131.
  27. Franceschini, I. and Desroziers, E. (2013) Development and aging of the kisspeptin-GPR54 system in the mammalian brain: what are the impacts on female reproductive function? *Front Endocrinol. (Lausanne)*, **4**, 22.
  28. Raskin, K., de Gendt, K., Duittoz, A., Liere, P., Verhoeven, G., Tronche, F. and Mhaouty-Kodja, S. (2009) Conditional inactivation of androgen receptor gene in the nervous system: effects on male behavioral and neuroendocrine responses. *J. Neurosci.*, **29**, 4461–4470.
  29. Galeeva, A. and Tuohimaa, P. (2001) Analysis of mouse plus-maze behavior modulated by ovarian steroids. *Behav. Brain Res.*, **119**, 41–47.
  30. Walf, A.A., Koonce, C., Manley, K. and Frye, C.A. (2009) Proestrous compared to diestrous wildtype, but not estrogen receptor beta knockout, mice have better performance in the spontaneous alternation and object recognition tasks and reduced anxiety-like behavior in the elevated plus and mirror maze. *Behav. Brain Res.*, **196**, 254–260.

31. Navarro, V.M., Gottsch, M.L., Chavkin, C., Okamura, H., Clifton, D.K. and Steiner, R.A. (2009) Regulation of gonadotropin-releasing hormone secretion by kisspeptin/dynorphin/neurokinin B neurons in the arcuate nucleus of the mouse. *J. Neurosci.*, **29**, 11859–11866.
32. Navarro, V.M., Ruiz-Pino, F., Sánchez-Garrido, M.A., García-Galiano, D., Hobbs, S.J., Manfredi-Lozano, M., León, S., Sanguiao-Alvarellos, S., Castellano, J.M., Clifton, D.K. et al. (2012) Role of neurokinin B in the control of female puberty and its modulation by metabolic status. *J. Neurosci.*, **32**, 2388–2397.
33. Topaloglu, A.K. (2010) Neurokinin B signaling in puberty: human and animal studies. *Mol. Cell Endocrinol.*, **324**, 64–69.
34. Clarkson, J. and Herbison, A.E. (2006) Postnatal development of kisspeptin neurons in mouse hypothalamus; sexual dimorphism and projections to gonadotropin-releasing hormone neurons. *Endocrinology*, **147**, 5817–5825.
35. Malikov, V. and Madeira, M.D. (2013) Regulation of ER $\alpha$  protein expression by 17 $\beta$ -estradiol in cultured neurons of hypothalamic ventromedial nucleus. *Neurochem. Res.*, **38**, 82–89.
36. Frazão, R., Cravo, R.M., Donato, J. Jr, Ratra, D.V., Clegg, D.J., Elmquist, J.K., Zigman, J.M., Williams, K.W. and Elias, C.F. (2013) Shift in Kiss1 cell activity requires estrogen receptor  $\alpha$ . *J. Neurosci.*, **33**, 2807–2820.
37. Takase, K., Uenoyama, Y., Inoue, N., Matsui, H., Yamada, S., Shimizu, M., Homma, T., Tomikawa, J., Kanda, S., Matsumoto, H. et al. (2009) Possible role of oestrogen in pubertal increase of Kiss1/kisspeptin expression in discrete hypothalamic areas of female rats. *J. Neuroendocrinol.*, **21**, 527–537.
38. Walker, D.M., Kirson, D., Perez, L.F. and Gore, A.C. (2012) Molecular profiling of postnatal development of the hypothalamus in female and male rats. *Biol. Reprod.*, **87**, 129.
39. Hu, M.H., Li, X.F., McCausland, B., Li, S.Y., Gresham, R., Kinsey-Jones, J.S., Gardiner, J.V., Sam, A.H., Bloom, S.R., Poston, L. et al. (2015) Relative importance of the arcuate and anteroventral periventricular kisspeptin neurons in control of puberty and reproductive function in female rats. *Endocrinology*, **156**, 2619–2631.
40. Redmond, J.S., Macedo, G.G., Velez, I.C., Caraty, A., Williams, G.L. and Amstalden, M. (2011) Kisspeptin activates the hypothalamic-adenohypophyseal-gonadal axis in prepubertal ewe lambs. *Reproduction*, **141**, 541–548.
41. Shahab, M., Mastronardi, C., Seminara, S.B., Crowley, W.F., Ojeda, S.R. and Plant, T.M. (2005) Increased hypothalamic GPR54 signaling: a potential mechanism for initiation of puberty in primates. *Proc. Natl. Acad. Sci. USA*, **102**, 2129–2134.
42. Gill, J.C., Navarro, V.M., Kwong, C., Noel, S.D., Martin, C., Xu, S., Clifton, D.K., Carroll, R.S., Steiner, R.A. and Kaiser, U.B. (2012) Increased neurokinin B (Tac2) expression in the mouse arcuate nucleus is an early marker of pubertal onset with differential sensitivity to sex steroid-negative feedback than Kiss1. *Endocrinology*, **153**, 4883–4893.
43. Semaan, S.J. and Kauffman, A.S. (2015) Daily successive changes in reproductive gene expression and neuronal activation in the brains of pubertal female mice. *Mol. Cell Endocrinol.*, **401**, 84–97.
44. Gonzales, K.L., Tetel, M.J. and Wagner, C.K. (2008) Estrogen receptor (ER) beta modulates ERalpha responses to estrogens in the developing rat ventromedial nucleus of the hypothalamus. *Endocrinology*, **149**, 4615–4621.
45. Hall, J.M. and McDonnell, D.P. (1999) The estrogen receptor beta-isoform (ERbeta) of the human estrogen receptor modulates ERalpha transcriptional activity and is a key regulator of the cellular response to estrogens and antiestrogens. *Endocrinology*, **140**, 5566–5578.
46. Paech, K., Webb, P., Kuiper, G.G., Nilsson, S., Gustafsson, J., Kushner, P.J. and Scanlan, T.S. (1997) Differential ligand activation of estrogen receptors ERalpha and ERbeta at AP1 sites. *Science*, **277**, 1508–1510.
47. Pettersson, K., Delaunay, F. and Gustafsson, J.A. (2000) Estrogen receptor beta acts as a dominant regulator of estrogen signaling. *Oncogene*, **19**, 4970–4978.
48. Titolo, D., Cai, F. and Belsham, D.D. (2006) Coordinate regulation of neuropeptide Y and agouti-related peptide gene expression by estrogen depends on the ratio of estrogen receptor (ER) alpha to ERbeta in clonal hypothalamic neurons. *Mol. Endocrinol.*, **20**, 2080–2092.
49. Smith, J.T., Cunningham, M.J., Rissman, E.F., Clifton, D.K. and Steiner, R.A. (2005) Regulation of Kiss1 gene expression in the brain of the female mouse. *Endocrinology*, **146**, 3686–3692.
50. Hrabovszky, E., Shughrue, P.J., Merchenthaler, I., Hajszán, T., Carpenter, C.D., Liposits, Z. and Petersen, S.L. (2000) Detection of estrogen receptor-beta messenger ribonucleic acid and 125I-estrogen binding sites in luteinizing hormone-releasing hormone neurons of the rat brain. *Endocrinology*, **141**, 3506–3509.
51. Hrabovszky, E., Steinhauser, A., Barabás, K., Shughrue, P.J., Petersen, S.L., Merchenthaler, I. and Liposits, Z. (2001) Estrogen receptor-beta immunoreactivity in luteinizing hormone-releasing hormone neurons of the rat brain. *Endocrinology*, **142**, 3261–3264.
52. Snyder, M.A., Smejkalova, T., Forlano, P.M. and Woolley, C.S. (2010) Multiple ERbeta antisera label in ERbeta knockout and null mouse tissues. *J. Neurosci. Methods*, **188**, 226–234.
53. Ng, Y., Wolfe, A., Novaira, H.J. and Radovick, S. (2009) Estrogen regulation of gene expression in GnRH neurons. *Mol. Cell Endocrinol.*, **303**, 25–33.
54. Antal, M.C., Petit-Demoulière, B., Meziane, H., Chambon, P. and Krust, A. (2012) Estrogen dependent activation function of ER $\beta$  is essential for the sexual behavior of mouse females. *Proc. Natl. Acad. Sci. USA*, **109**, 19822–19827.
55. Jayes, F.L., Burns, K.A., Rodriguez, K.F., Kissling, G.E. and Korach, K.S. (2014) The naturally occurring luteinizing hormone surge is diminished in mice lacking estrogen receptor Beta in the ovary. *Biol. Reprod.*, **90**, 24.
56. Brock, O., Baum, M.J. and Bakker, J. (2011) The development of female sexual behavior requires prepubertal estradiol. *J. Neurosci.*, **31**, 5574–5578.
57. Suzuki, H., Barros, R.P.A., Sugiyama, N., Krishnan, V., Yaden, B.C., Kim, H.-J., Warner, M. and Gustafsson, J.-Å. (2013) Involvement of estrogen receptor  $\alpha$  in maintenance of serotonergic neurons of the dorsal raphe. *Mol. Psychiatry*, **18**, 674–680.
58. Zuloaga, D.G., Zuloaga, K.L., Hinds, L.R., Carbone, D.L. and Handa, R.J. (2014) Estrogen receptor  $\alpha$  expression in the mouse forebrain: age and sex differences. *J. Comp. Neurol.*, **522**, 358–371.
59. Ojeda, S.R., Lomniczi, A. and Sandau, U. (2010) Contribution of glial-neuronal interactions to the neuroendocrine control of female puberty. *Eur. J. Neurosci.*, **32**, 2003–2010.
60. Tronche, F., Kellendonk, C., Kretz, O., Gass, P., Anlag, K., Orban, P.C., Bock, R., Klein, R. and Schütz, G. (1999) Disruption of the glucocorticoid receptor gene in the nervous system results in reduced anxiety. *Nat. Genet.*, **23**, 99–103.
61. Naulé, L., Picot, M., Martini, M., Parmentier, C., Hardin-Pouzet, H., Keller, M., Franceschini, I. and Mhaouty-Kodja, S. (2014) Neuroendocrine and behavioral effects of maternal exposure to oral bisphenol A in female mice. *J. Endocrinol.*, **220**, 375–388.

62. Cravo, R.M., Margatho, L.O., Osborne-Lawrence, S., Donato, J., Atkin, S., Bookout, A.L., Rovinsky, S., Frazão, R., Lee, C.E., Gauthron, L. et al. (2011) Characterization of Kiss1 neurons using transgenic mouse models. *Neuroscience*, **173**, 37–56.
63. Quennell, J.H., Howell, C.S., Roa, J., Augustine, R.A., Grattan, D.R. and Anderson, G.M. (2011) Leptin deficiency and diet-induced obesity reduce hypothalamic kisspeptin expression in mice. *Endocrinology*, **152**, 1541–1550.
64. Xi, W., Lee, C.K.F., Yeung, W.S.B., Giesy, J.P., Wong, M.H., Zhang, X., Hecker, M. and Wong, C.K.C. (2011) Effect of perinatal and postnatal bisphenol A exposure to the regulatory circuits at the hypothalamus-pituitary-gonadal axis of CD-1 mice. *Reprod. Toxicol.*, **31**, 409–417.
65. Kundakovic, M., Gudsruk, K., Franks, B., Madrid, J., Miller, R.L., Perera, F.P. and Champagne, F.A. (2013) Sex-specific epigenetic disruption and behavioral changes following low-dose in utero bisphenol A exposure. *Proc. Natl. Acad. Sci. USA*, **110**, 9956–9961.
66. Popa, S.M., Moriyama, R.M., Caligioni, C.S., Yang, J.J., Cho, C.M., Concepcion, T.L., Oakley, A.E., Lee, I.H., Sanz, E., Amieux, P.S. et al. (2013) Redundancy in Kiss1 expression safeguards reproduction in the mouse. *Endocrinology*, **154**, 2784–2794.
67. Pfaffl, M.W. (2001) A new mathematical model for relative quantification in real-time RT-PCR. *Nucleic Acids Res.*, **29**, e45.
68. Franceschini, I., Yeo, S.H., Beltramo, M., Desroziers, E., Okamura, H., Herbison, A.E. and Caraty, A. (2013) Immunohistochemical evidence for the presence of various kisspeptin isoforms in the mammalian brain. *J. Neuroendocrinol.*, **25**, 839–851.
69. Caldani, M., Batailler, M., Thiéry, J.C. and Dubois, M.P. (1988) LHRH-immunoreactive structures in the sheep brain. *Histochemistry*, **89**, 129–139.
70. Paxinos, G. and Franklin, K.B.J. (2001) *The Mouse Brain in Stereotaxic Coordinates*, 2nd edn. Academic Press, San Diego.
